# Supplementary material
Source: MDPI journal article supplement (https://www.mdpi.com/2073-4344/11/11/1323)
Supplement: s1 [file s1]

# Direct Etherification Reaction of Glycerol Using Alkali Metal Cation ( $\text{Li}^+$ , $\text{Na}^+$ and $\text{K}^+$ ) Containing X-Type Zeolites as Heterogeneous Catalysts: Optimization of the Reaction Conditions

Seo Kyung Park, Dae Won Kim, Su Yeon Lee and Je Seung Lee \*

Department of Chemistry, Kyung Hee University, 26 Kyungheedaero-ro, Dongdaemun-gu, Seoul 02447, Korea; tjrud1015@naver.com (S.K.P.); david.pinkim@khu.ac.kr (D.W.K.); tndus4631@naver.com (S.Y.L.)

\* Correspondence: leejs70@khu.ac.kr; Tel.: +82-2-961-0458

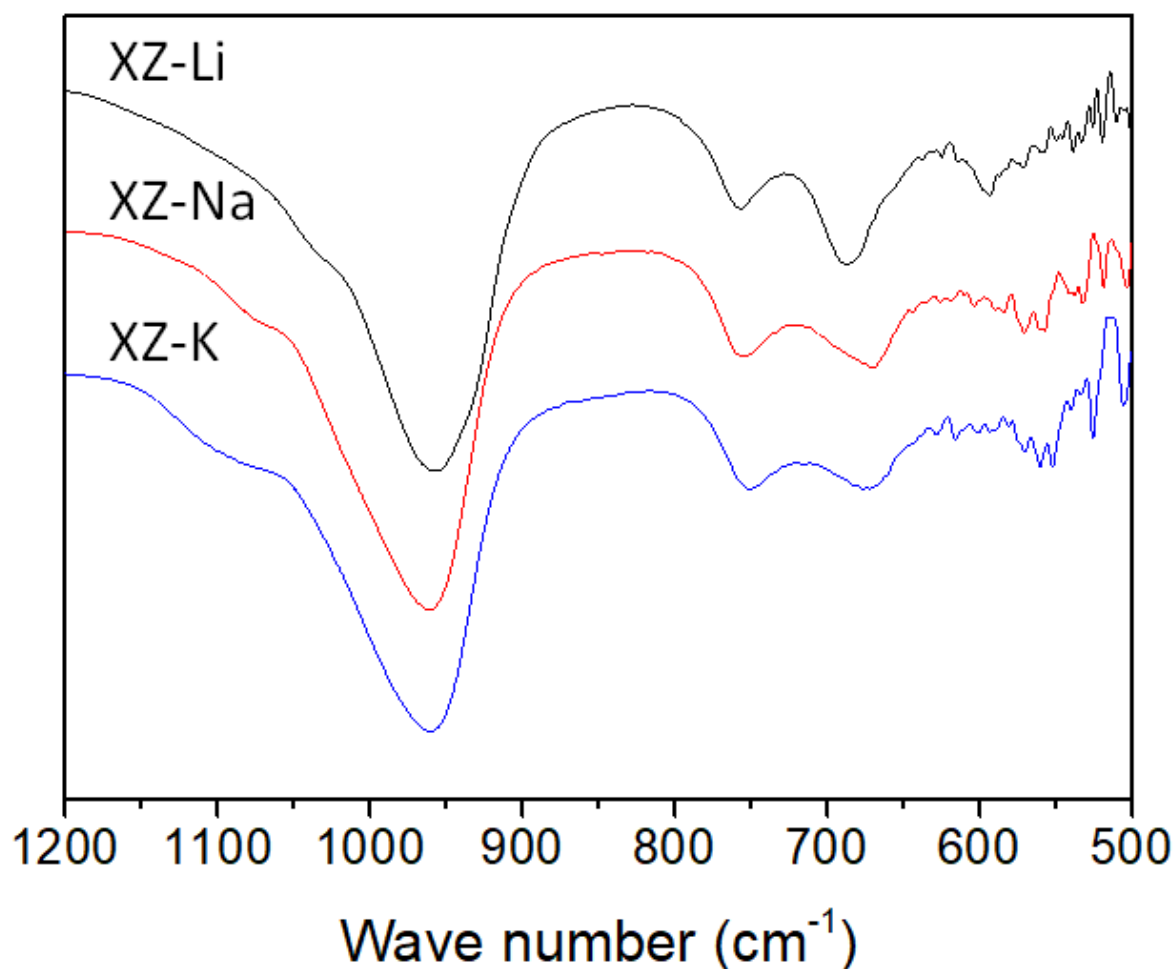

**Figure S1.** FT-IR spectra of zeolite XZ-M (M = Li, Na, and K).

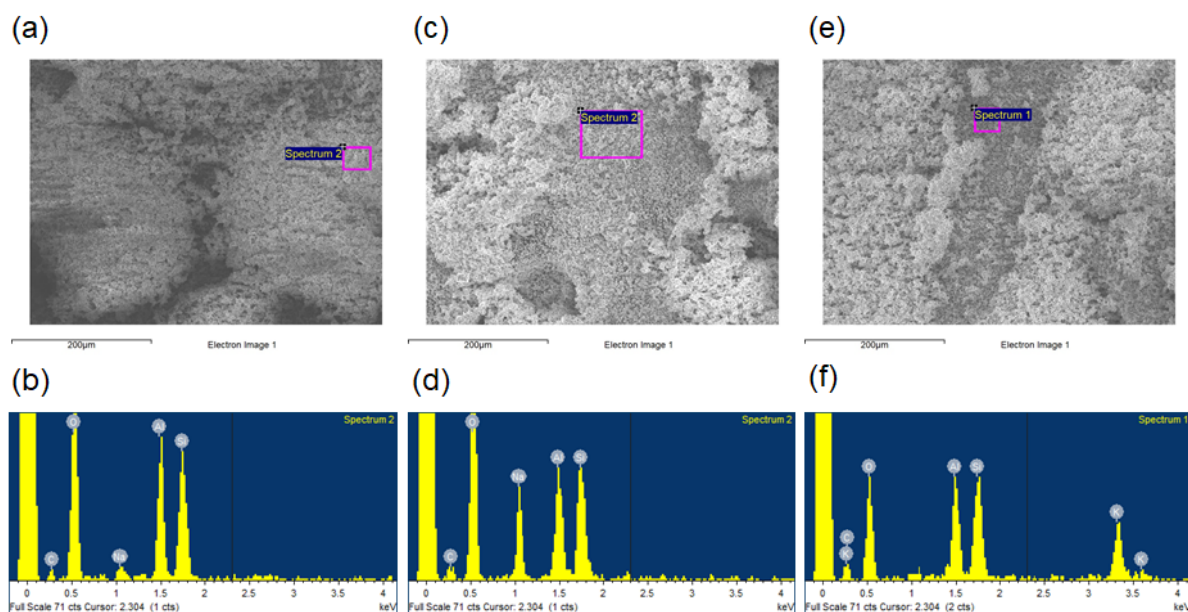

**Figure S2.** SEM images and EDX data of zeolite (a) and (b) XZ-Li, (c) and (d) XZ-Na, (e) and (f) XZ-K, respectively.

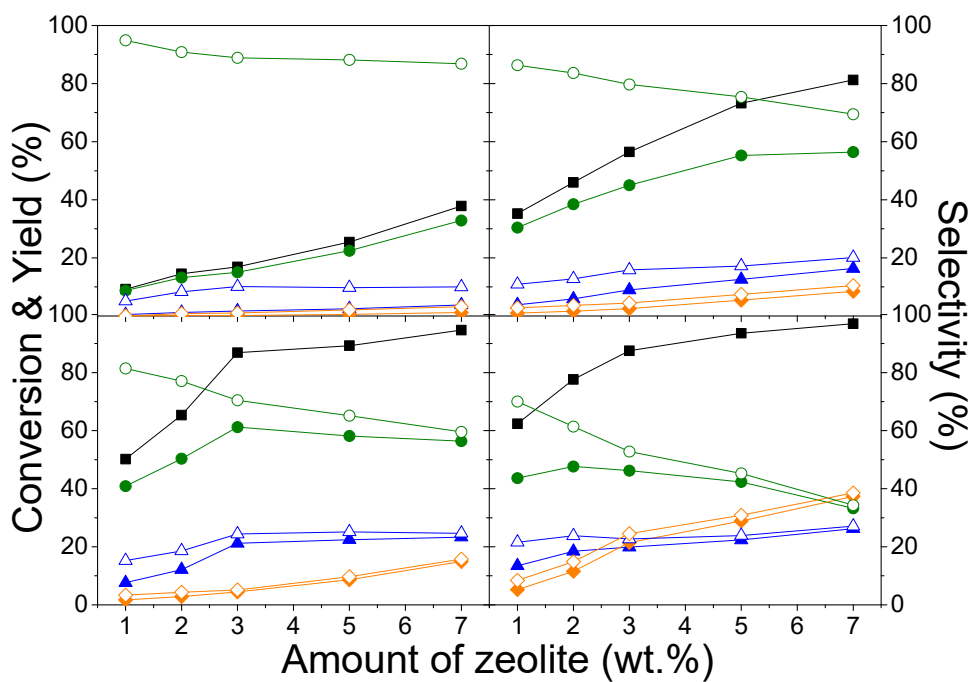

**Figure S3.** The influence of the amount of XZ-Li on the etherification reaction of glycerol at (a) 260, (b) 270, (c) 280, and (d) 290 °C (-■-: Conversion of glycerol, -●-: Yield of DG, -▲-: Yield of TG, -◆-: Yield of others -○-: Selectivity of DG, -△-: Selectivity of TG, -◇-: Selectivity of others, reaction time: 2 h).

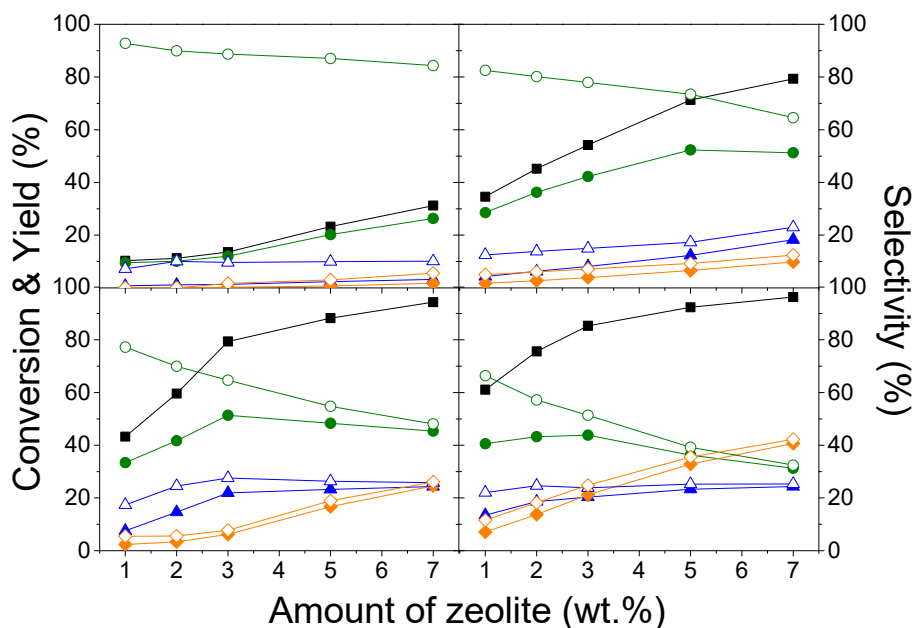

**Figure S4.** The influence of the amount of XZ-Na on the etherification reaction of glycerol at (a) 260, (b) 270, (c) 280, and (d) 290 °C (-■-: Conversion of glycerol, -●-: Yield of DG, -▲-: Yield of TG, -◆-: Yield of others -○-: Selectivity of DG, -△-: Selectivity of TG, -◇-: Selectivity of others, reaction time: 2 h).

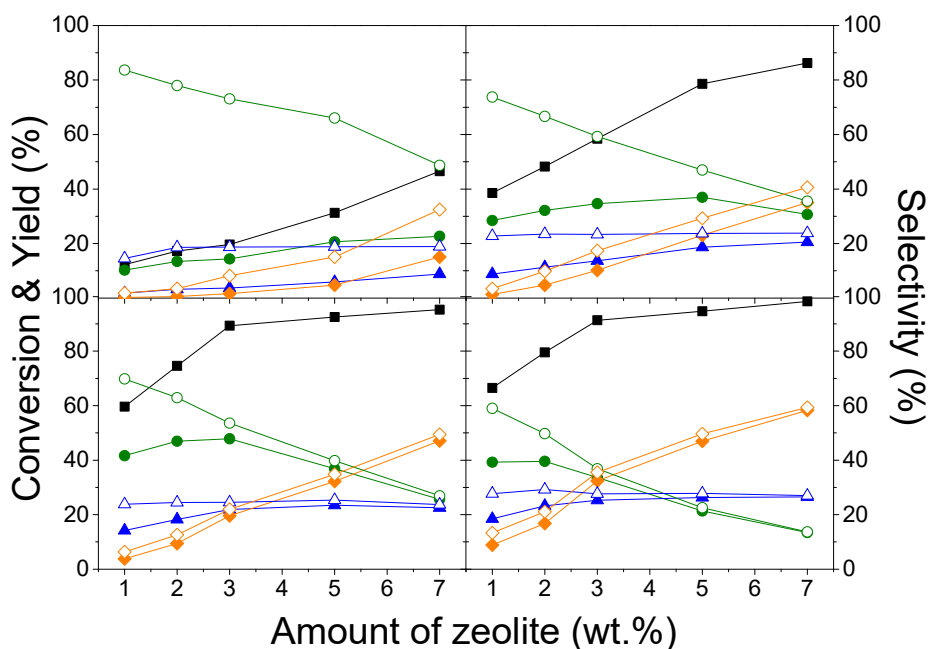

**Figure S5.** The influence of the amount of XZ-K on the etherification reaction of glycerol at (a) 260, (b) 270, (c) 280, and (d) 290 °C (-■-: Conversion of glycerol, -●-: Yield of DG, -▲-: Yield of TG, -◆-: Yield of others -○-: Selectivity of DG, -△-: Selectivity of TG, -◇-: Selectivity of others, reaction time: 2 h).

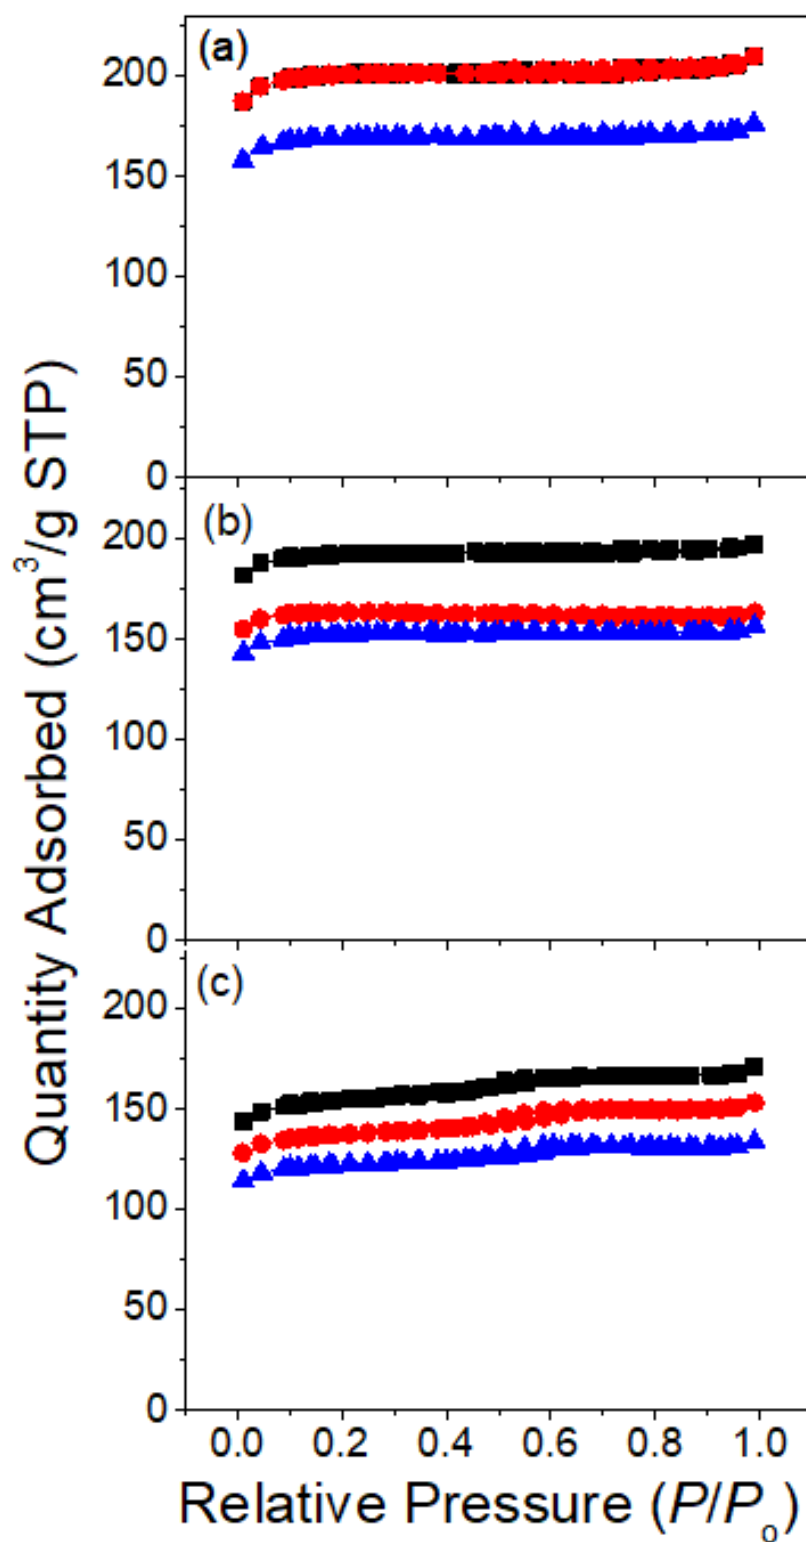

**Figure S6.** N<sub>2</sub> sorption isotherms of (a) XZ-Li, (b) XZ-Na, and (c) XZ-K (black: Pristine zeolite, red: After the first reaction, blue: After the fifth reaction).

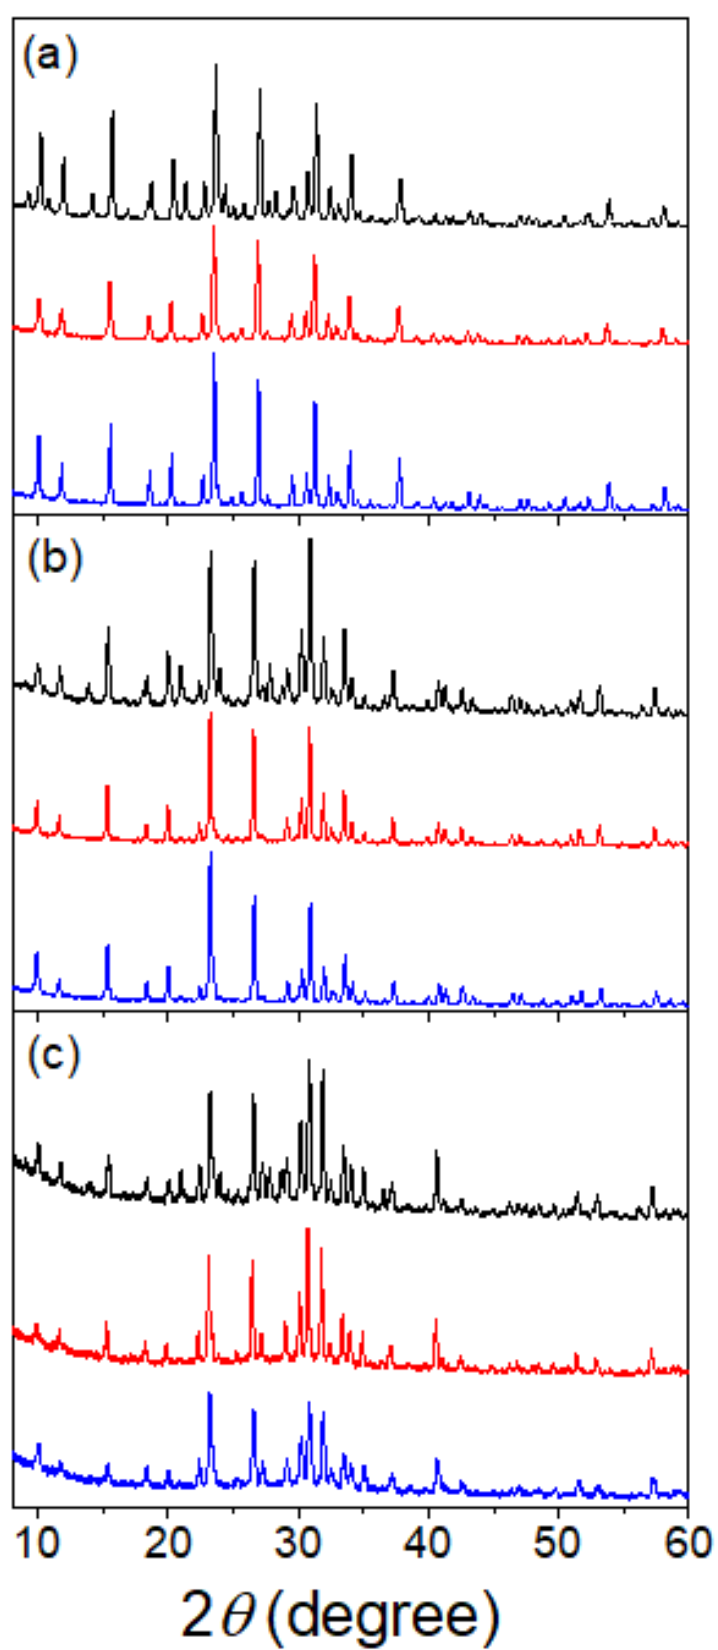

**Figure S7.** XRD patterns of (a) XZ-Li, (b) XZ-Na, and (c) XZ-K (black: Pristine zeolite, red: After the first reaction, blue: After the fifth reaction).

**Table S1.** Structural characterization of XZ-M.

| Catalyst | Atomic ratio (%) |       |       |       |       | Surface area<br>(m <sup>2</sup> g <sup>-1</sup> ) | Pore volume<br>(cm <sup>3</sup> g <sup>-1</sup> ) | Crystallinity<br>(%) |
|----------|------------------|-------|-------|-------|-------|---------------------------------------------------|---------------------------------------------------|----------------------|
|          | O                | Na    | Al    | Si    | K     |                                                   |                                                   |                      |
| XZ-Li    | 60.94            | 1.81  | 11.53 | 16.12 | -     | 596                                               | 0.32                                              | 84.2                 |
| XZ-Na    | 64.65            | 10.26 | 10.47 | 14.62 | -     | 541                                               | 0.27                                              | 87.7                 |
| XZ-K     | 61.11            | -     | 11.56 | 16.23 | 11.10 | 465                                               | 0.26                                              | 78.9                 |

**Table S2.** Recycling of XZ-M for the direct etherification of glycerol.

| Cycle No. |                        | 1    | 2    | 3    | 4    | 5    |
|-----------|------------------------|------|------|------|------|------|
| XZ-Li     | Conversion of glycerol | 86.9 | 58.8 | 87.2 | 83.1 | 81.2 |
|           | Yield of DG            | 61.2 | 60.1 | 61.0 | 58.2 | 56.8 |
|           | Yield of TG            | 21.2 | 20.6 | 20.9 | 19.9 | 19.5 |
| XZ-Na     | Conversion of glycerol | 79.4 | 73.2 | 74.2 | 73.4 | 71.2 |
|           | Yield of DG            | 51.4 | 47.4 | 48.0 | 47.5 | 46.1 |
|           | Yield of TG            | 21.9 | 20.2 | 20.5 | 20.3 | 19.7 |
| XZ-K      | Conversion of glycerol | 89.3 | 86.4 | 84.1 | 81.2 | 78.3 |
|           | Yield of DG            | 47.9 | 45.8 | 44.6 | 43.0 | 41.5 |
|           | Yield of TG            | 21.9 | 20.7 | 20.2 | 19.5 | 18.8 |
